# Supplementary material for: Carbon hollow fiber membranes for a molecular sieve with precise-cutoff ultramicropores for superior hydrogen separation
Source: PubMed Central journal article supplement (PMC7801458; doi:10.1038/s41467-020-20628-9), 2021-01-11
Supplement: 41467_2020_20628_MOESM1_ESM.pdf [file 41467_2020_20628_MOESM1_ESM.pdf]

## Supplementary Information for

# Carbon hollow fiber membranes for a molecular sieve with precise-cutoff ultramicropores for superior hydrogen separation

Linfeng Lei<sup>1</sup>, Fengjiao Pan<sup>2</sup>, Arne Lindbråthen<sup>1</sup>, Xiangping Zhang<sup>2</sup>, Magne Hillestad<sup>1</sup>, Yi Nie<sup>2</sup>,  
Lu Bai<sup>2</sup>, Xuezhong He<sup>1,3\*</sup>, Michael D. Guiver<sup>4\*</sup>

### Affiliations

<sup>1</sup>Department of Chemical Engineering, Norwegian University of Science and Technology, NO-7491 Trondheim, Norway.

<sup>2</sup>Beijing Key Laboratory of Ionic Liquids Clean Process, Institute of Process Engineering, Chinese Academy of Sciences, P.O. Box 353, Beijing 100190, China.

<sup>3</sup>Department of Chemical Engineering, Guangdong Technion Israel Institute of Technology (GTIIT), 241 Daxue Road, Shantou 515063, China.

<sup>4</sup>State Key Laboratory of Engines, School of Mechanical Engineering, and Collaborative Innovation Center of Chemical Science and Engineering (Tianjin), Tianjin University, Tianjin 300072, China.

\*Corresponding author email: [xuezhong.he@gtiit.edu.cn](mailto:xuezhong.he@gtiit.edu.cn) (X. He); [michael.guiver@outlook.com](mailto:michael.guiver@outlook.com) (M. D. Guiver)

## **Table of contents**

**Supplementary Note 1.** Tuning coagulation temperature.

**Supplementary Note 2.** Preparation of asymmetric cellulose hollow fiber membrane.

**Supplementary Note 3.** Carbonization protocols and proposed carbonization mechanism for cellulose.

**Supplementary Note 4.** Nanoindentation test

**Supplementary Note 5.** XPS and Raman characterization.

**Supplementary Note 6.** Apparent activation energies for the CHFMs.

**Supplementary Note 7.** Possible issues for membrane fabrication scale-up

**Supplementary Fig. 1.** Comparative cross-sectional SEM images of flat sheet membranes cast at various coagulation bath temperatures.

**Supplementary Fig. 2.** SEM cross-sectional image of a flat-sheet cellulose dense membrane cast at  $T_c$  25 °C and  $T_d$  60 °C.

**Supplementary Fig. 3.** Comparative cross-sectional SEM images of flat-sheet membranes cast with various thicknesses. a) the whole thickness is the selective layer; b) and c) asymmetric films with dense selective layers and porous support layers.

**Supplementary Fig. 4.** Cross-sectional SEM images of a cellulose hollow fiber carbon membrane precursor with ambient air drying, directly from water-wetted membranes.

**Supplementary Fig. 5.** Cross-sectional SEM images (a and b) of a cellulose hollow fiber precursor dried after anti-collapse treatment. c) FTIR analysis of the dried cellulose fibers. d) TGA analysis of cellulose hollow fiber.

**Supplementary Fig. 6.** Carbonization protocols for cellulose hollow fiber precursors.

**Supplementary Fig. 7.** Load–displacement curves of CHFMs from nanoindentation tests.

**Supplementary Fig. 8.** Pore size distribution of carbon films, calculated by the NLDFT model from CO<sub>2</sub> physisorption at 0 °C.

**Supplementary Fig. 9.** Surface area and pore volume of CHFMs

**Supplementary Fig. 10.** CO<sub>2</sub> uptake of CHFMs

**Supplementary Fig. 11.** a) XPS survey spectra, and b) O 1s spectra for three different CHFMs

**Supplementary Fig. 12.** a) C 1s XPS spectra and b) Raman spectra of three different CHFMs.

**Supplementary Fig. 13.** A Proposed mechanism of transformation from cellulose precursors to CMS membranes.

**Supplementary Fig. 14.** The evolved small gas molecules of CO<sub>2</sub>, H<sub>2</sub>, H<sub>2</sub>O, and CH<sub>4</sub> from cellulose carbonization under different carbonization procedures as measured by TGA-MS.

**Supplementary Fig. 15.** Arrhenius plots for H<sub>2</sub> and CO<sub>2</sub> permeances, a) CHFMs-550. b) CHFMs-700 and c) CHFMs-850.

**Supplementary Fig. 16.** Normalized H<sub>2</sub> permeance (a) and H<sub>2</sub>/CO<sub>2</sub> selectivity (b) as a function of aging time, tested at 130 °C for single gas.

**Supplementary Fig. 17.** Illustration of the high-pressure mixed gas permeation rig with humidity control

**Supplementary Fig. 18.** A representative module used for mixed gas permeation measurements operated in a counter-current flow pattern.

**Supplementary Fig. 19.** Contact angles of water on the CMS membranes prepared at different carbonization temperatures

**Supplementary Fig. 20.** Comparison of separation performance of CHFMs with state-of-the-art inorganic membrane materials on an upper bound plot presenting gas permeance (GPU).

**Supplementary Fig. 21.** Comparison of separation performance of CHFMs-850 with state-of-the-art inorganic membrane materials. a) H<sub>2</sub>/N<sub>2</sub> separation. b) H<sub>2</sub>/CH<sub>4</sub> separation.

**Supplementary Fig. 22.** Schematic of membrane module for carbon hollow fiber membranes, a) for mixed gas testing, and b) for single gas testing.

**Supplementary Fig. 23.** Photographs of a membrane module being bent with a diameter of 3.7 cm and used for single gas permeation tests.

**Supplementary Table 1.** Cellulose hollow fiber spinning conditions.

**Supplementary Table 2.** Hardness, reduced modulus, and Young's modulus of CHFMs

**Supplementary Table 3.** Elemental composition of the CHFMs from XPS analysis.

**Supplementary Table 4.** Membrane performances of polymeric and inorganic membranes presented in Fig. 4.

**Supplementary Table 5.** Membrane performances of inorganic-based membranes presented in Supplementary Fig. 21a.

**Supplementary Table 6.** Membrane performances of inorganic-based membranes presented in Supplementary Fig. 21b.

## Supplementary Note 1. Tuning coagulation temperature

Temperatures of the dope solutions ( $T_d$ ) and coagulation bath ( $T_c$ ) were investigated to determine the optimal membrane formation conditions. Different flat sheet membranes were cast under various  $T_c$  conditions in the range of 25 °C to 60 °C, while  $T_d$  was maintained at 25 °C. A solvent exchange protocol was used to prevent pore morphology collapse. The water-wetted cellulose membranes were immersed into pure isopropanol for 2 h, followed by soaking in n-hexane for 2 h, and then all the membranes were allowed to dry under ambient conditions in air. It was found that the cellulose membranes had relatively dense morphology when the  $T_c$  was below 45 °C (**Supplementary Figs. 1a-c**). However, when the  $T_c$ s were  $\geq 45$  °C, clear asymmetric structures with a dense top layers and porous support structures were generated (**Supplementary Figs. 1d-f**). In contrast, a warmer dope solution ( $T_d = 60$  °C) cast onto a glass plate and coagulated in a 25 °C water bath presents a dense symmetric membrane morphology, as shown in **Supplementary Fig. 2**. Thus, the coagulation bath temperature plays a crucial role for generating asymmetric cellulose membrane morphology. The critical temperature to generate asymmetric morphology is found to be  $\sim 45$  °C, and asymmetric membranes could be obtained only when  $T_c \geq 45$  °C. Moreover, in order to obtain a relatively thinner selective layer, a  $T_c$  of 60 °C was selected for spinning cellulose hollow fibers in the subsequent work.

Flat-sheet cellulose films with different thicknesses were cast and dried under the same conditions as those used for the spinning process, as shown in **Supplementary Fig. 3**. When a thin film with a thickness of smaller than 10  $\mu\text{m}$  was made (**Supplementary Fig. 3a**), the bulk film presented entirely dense morphology, which is representative of the selective layer of the CHFMs. Thus, the thinnest cellulose films were carbonized, and the obtained carbon films were used for structural characterization.

## **Supplementary Note 2: preparation of asymmetric cellulose hollow fiber membranes**

**Supplementary Fig. 4** shows cross-sectional SEM images of a cellulose hollow fiber that was dried directly in air without solvent exchange treatment to prevent pore collapse. It presents a dense and symmetric structure. However, **Supplementary Figs. 5a** and **5b** show the cross-sectional SEM images of the spun hollow fibers, and a clear asymmetric structure with a porous inner support layer and dense outer layer is evident. The asymmetric morphological structure was maintained by applying a solvent exchange protocol using first isopropanol, followed by *n*-hexane). The precursor fibers were dried in air before conducting the carbonization process. The dried cellulose hollow fibers were analyzed by FTIR and TGA, and the results are shown in **Supplementary Fig. 5c** and **5d**, respectively.

### **Supplementary Note 3. Carbonization protocols and proposed carbonization mechanism for cellulose**

The carbonization protocols selected are based on the TGA analysis of cellulose precursors in **Supplementary Fig. 5d**. A dwell-time of 2 h at 300 °C was employed to take into account the significant weight loss at this temperature due cellulose depolymerization. Three types of carbon membranes were obtained by carbonization protocols at different final temperatures of 550, 700 and 850 °C, while all other carbonization parameters (e.g., heating rate, dwell time, etc.) were the same.

**Supplementary Fig. 13** outlines the transformation mechanism from cellulose precursors to CMS membranes, based on the characterization results of HR-TEM, XPS, Raman spectra and TGA-MS. When the final carbonization temperature is below 600 °C (in this work, 550 °C was used), disordered carbon “plates” were formed by intramolecular rearrangement, and a higher content of oxygen heteroatom existed in the carbon matrix by the formation of –OH, –COO, and –CH<sub>3</sub> groups, which contributed to the more disordered structure (**Supplementary Fig. 13c**). As the final carbonization temperature was increased to over 600 °C, and especially over 800 °C, pendant groups, such as –OH and –CH<sub>3</sub>, were removed by forming H<sub>2</sub>O and CO<sub>2</sub>, which resulted in a more ordered carbon structure (**Supplementary Fig. 13d**). This was also supported by the higher sp<sup>2</sup> carbon content and lower oxygen content in the XPS spectra. Furthermore, according to HR-TEM and PSD, it can be proposed that the ultramicropores are from the inter-planar spacing, while the micropore contribution is from the imperfect packing of the carbon sheets.

#### Supplementary Note 4. Nanoindentation test

The hardness, the reduced elastic modulus, and Young's modulus of CHFMs were measured by nanoindentation tests using a Berkovich indenter. The CHFM samples were loaded to the maximum load ( $P_{max} = 1$  mN) in 5 s and then held for 2 s, followed by unloading in 5 s. The measured hardness and reduced elastic modulus are summarized in **Supplementary Table 2**. The Young's modulus ( $E$ , GPa) were estimated using the Oliver–Pharr method <sup>1</sup> as follows:

$$\frac{1}{E_r} = \frac{1-\nu^2}{E} + \frac{1-\nu_{tip}^2}{E_{tip}} \quad (1)$$

Where  $\nu$  and  $E$  are Poisson's ratio and Young's modulus of the CHFMs, respectively.  $\nu_{tip}$  and  $E_{tip}$  are Poisson's ratio and Young's modulus of the indenter, respectively.  $\nu_{tip} = 0.07$  and  $E_{tip} = 1140$  GPa. Poisson's ratio of CHFMs is assumed to be the same and equal to 0.2.<sup>2</sup> Since  $E_{tip} \gg E_r$ , the second term of the equation S1 is negligible. Hence, the Young's modulus of the samples is approximated to  $E = 0.96 E_r$ .

### Supplementary Note 5. XPS and Raman characterization

The CHFMs were characterized by XPS and Raman spectroscopy. The carbon content increases with the increase of carbonization temperature. Also, when the carbonization temperature is increased from 550 to 850 °C, the O contents was reduced from 9.26 Atomic % to 7.04 Atomic %. The trace amount of N-element (ca. 0.6 Atomic % in CHFMs) presented in CHFMs is probably derived from residual EmimAc in the cellulose precursors. Such a low content may not have a significant effect on the micropore structure, as most of the reported N-doped porous carbon materials contain 3%-10%. **Supplementary Fig. 12a** shows each C 1s spectrum deconvoluted into three main peaks. The peak located at ~284.7 eV corresponds to  $sp^2$ -hybridized carbon, while the peak at ~ 285.2 eV corresponds to  $sp^3$ -hybridized carbon. The third peak at ~ 286.3 eV is assigned to C–N or C–O bonds <sup>3,4</sup>. The fourth peak with much lower intensity located at ~ 289.2 eV is attributed to the C=O bond <sup>3,4</sup>.

The Raman spectra of the CHFMs were obtained by deconvolution of the spectra into 5 peaks - D1, D2, D3, D4 and G (**Supplementary Fig. 12b**). All CHFMs exhibit two major peaks, namely the G peak (Graphite band), located at ~1600  $cm^{-1}$ , which corresponds to the  $E_{2g}$ -symmetry vibration mode of  $sp^2$  hybridized carbon, and the D1 peak (Defect band) located at ~1346  $cm^{-1}$  which is the  $A_{1g}$ -symmetry vibration mode from the disordered graphite <sup>5,6</sup>. The D1 band is active when ring defects (ring breaks) are present within the graphite planes. The D2 band at ~ 1620  $cm^{-1}$  <sup>3</sup> is assigned to graphitic lattice vibrations mode with  $E_{2g}$  symmetry (disordered graphitic lattice). The D3 and D4 band are generally exhibited in highly disordered carbonaceous materials <sup>5,6</sup>. The D3 band, located at ~1525  $cm^{-1}$  is usually ascribed to amorphous carbon, while the D4 band at ~1165  $cm^{-1}$  is attributed to disordered graphitic lattice or  $sp^3$  impurities <sup>7</sup>.



### Supplementary Note 6. Apparent activation energies for the CHFMs

The apparent activation energies for the CHFMs were calculated by the Arrhenius relationship between gas permeance and testing temperature. Gas permeability ( $P$ , barrer) is the product of diffusivity ( $D$ ) and sorption coefficient ( $S$ ). Thus, gas permeance ( $P/l$ , GPU) can be described by Supplementary Equation (2),

$$\frac{P}{l} = \frac{D \times S}{l} \quad (2)$$

where  $l$  ( $\mu\text{m}$ ) is the membrane thickness of selective layer. For carbon molecular sieve (CMS) membranes, the diffusivity and solubility coefficients can be described by the Arrhenius equation (Supplementary Equation (3)) and the Van't Hoff equation (Supplementary Equation (4)), respectively <sup>8</sup>:

$$D = D_0 e^{-\frac{E_D}{RT}} \quad (3)$$

$$S = S_0 e^{-\frac{H_S}{RT}} \quad (4)$$

Where  $D_0$  and  $S_0$  are the pre-exponential factor for diffusion and sorption, respectively.  $E_D$  and  $H_S$  are the apparent diffusion activation energy and the apparent heat of sorption, respectively. Thus, the gas permeance in Supplementary Equation (2) can be rewritten as,

$$\frac{P}{l} = \frac{P_0}{l} e^{-\frac{E_P}{RT}} \quad (5)$$

Where  $E_P = E_D + H_S$ , is the apparent activation energy.  $P_0 = D_0 \times S_0$ . The  $E_P$  can be calculated by linear regression of the  $\ln(P/l)$  versus  $1/T$ , namely by Supplementary Equation (6):

$$\ln\left(\frac{P}{l}\right) = \ln\left(\frac{P_0}{l}\right) - \frac{E_P}{R} \frac{1}{T} \quad (6)$$

The apparent activation energies of for both  $\text{H}_2$  and  $\text{CO}_2$  permeate through different CHFMs are presented in **Supplementary Fig. 15**.

### **Supplementary Note 7. Possible issues for membrane fabrication scale-up**

Scaling-up of CHFMs prepared from cellulose and ionic liquids may still face the following challenges, and the potential solutions are listed correspondingly.

1. Reducing the ratio of EmimAc/DMSO in dope solution and recovering EmimAc can be applied to bring down the relatively high cost of ionic liquids.
2. It is crucial to drain the tars and remove vapors during the carbonization if large amounts of fibers are carbonized in a furnace. By setting a small angle (e.g.,  $6^\circ$ ) between the quartz support and furnace can be used for draining tars.
3. Membrane module design and construction are also important, such as CHFMs mounting, potting and sealing. Due to the  $H_2/CO_2$  separation are often used under high -temperature and -pressure conditions, a better potting material (compared to epoxy resin used in this work) that can endure the humidified gas at high pressure and temperature should be identified.

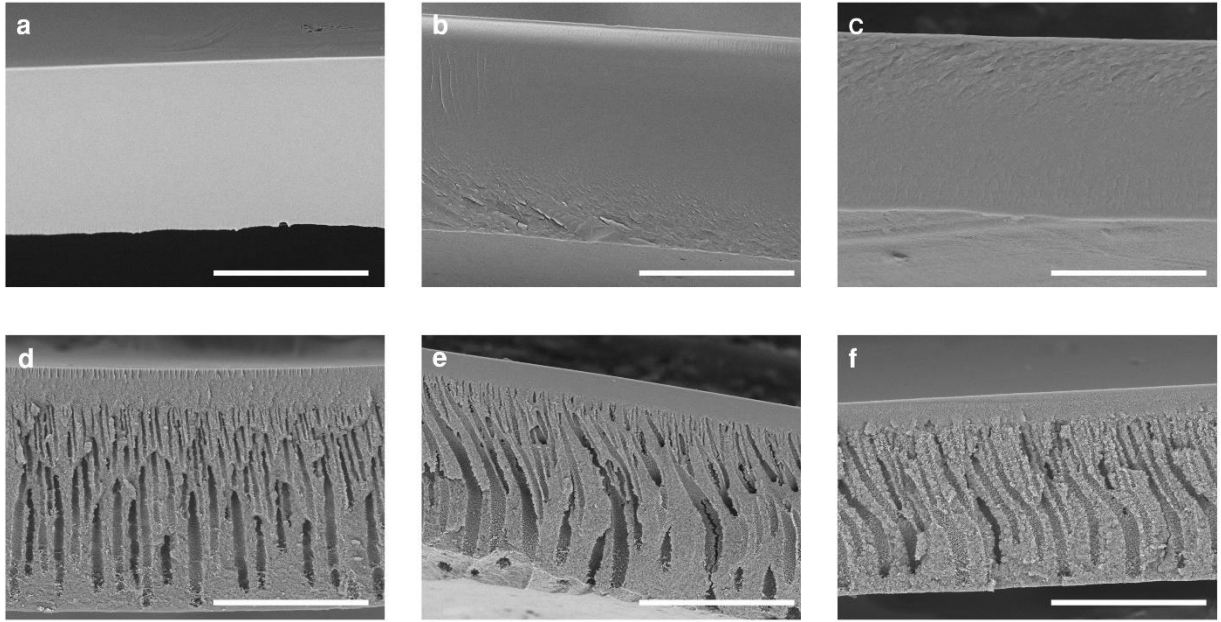

**Supplementary Fig. 1.** Comparative cross-sectional SEM images of flat sheet membranes cast at various coagulation bath temperatures ( $T_c$ ). a) 25 °C, b) 35 °C, c) 40 °C, d) 45 °C, e) 50 °C and f) 60 °C. The dope solution temperature ( $T_d$ ) was maintained at 25 °C. Scale bars: 100  $\mu\text{m}$ .

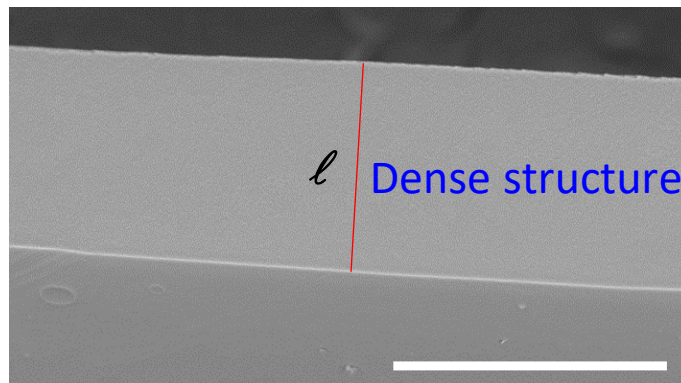

**Supplementary Fig. 2.** SEM cross-sectional image of a flat-sheet cellulose dense membrane cast at  $T_c$  25 °C and  $T_d$  60 °C. Scale bar: 100  $\mu\text{m}$ .

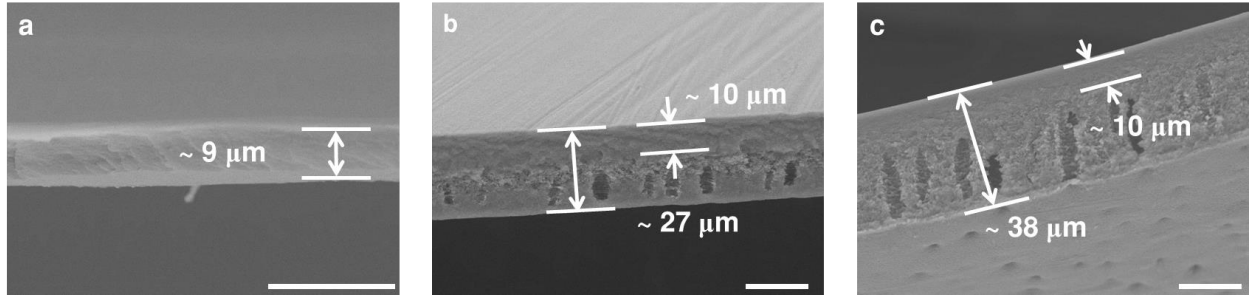

**Supplementary Fig. 3.** Comparative cross-sectional SEM images of flat-sheet membranes cast with various thicknesses. a) the whole thickness is the selective layer; b) and c) asymmetric films with dense selective layer and porous support layer. Scale bar: 20  $\mu\text{m}$ .

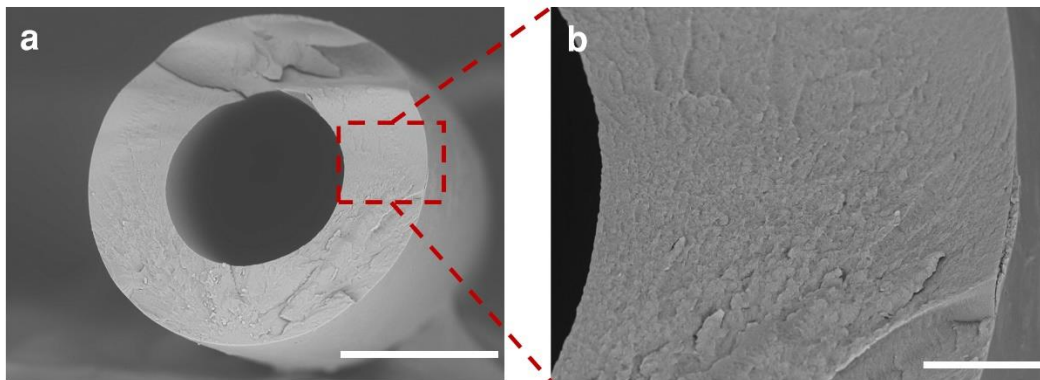

**Supplementary Fig. 4.** Cross-sectional SEM images of a cellulose hollow fiber carbon membrane precursor with ambient air drying, directly from water-wetted membranes. The hollow fiber presents a symmetric structure. Scale bars: a-200  $\mu\text{m}$ , b-30  $\mu\text{m}$ .

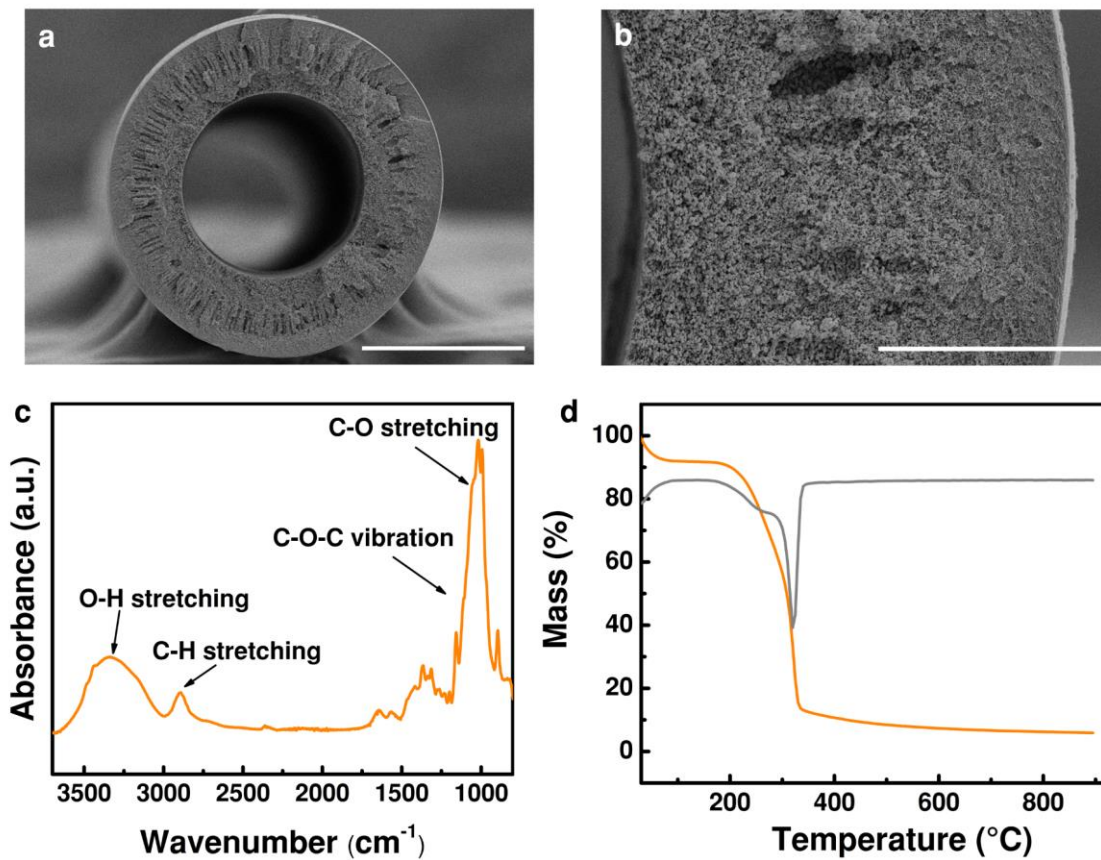

**Supplementary Fig. 5.** Cross-sectional SEM images (a and b) of a cellulose hollow fiber precursor dried after anti-collapse treatment. The hollow fiber presents an asymmetric structure with a dense outer layer and a porous inner support. Scale bars: a-200  $\mu\text{m}$ , b-50  $\mu\text{m}$ . c) FTIR analysis of the dried cellulose fibers. d) TGA analysis of cellulose hollow fiber. A significant weight loss occurs in the temperature range of 280-330  $^{\circ}\text{C}$ .

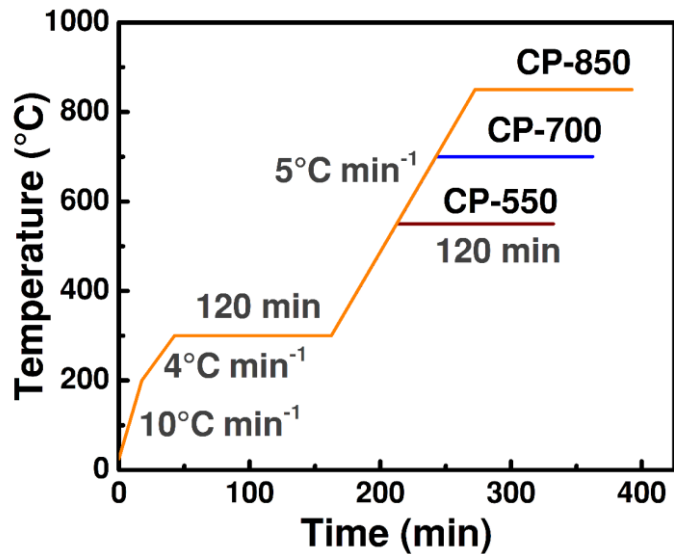

**Supplementary Fig. 6.** Carbonization protocols for cellulose hollow fiber precursors conducted in argon atmosphere at a continuous flow of 80 mL min<sup>-1</sup> with different final carbonization temperatures varying from 550-850 °C.

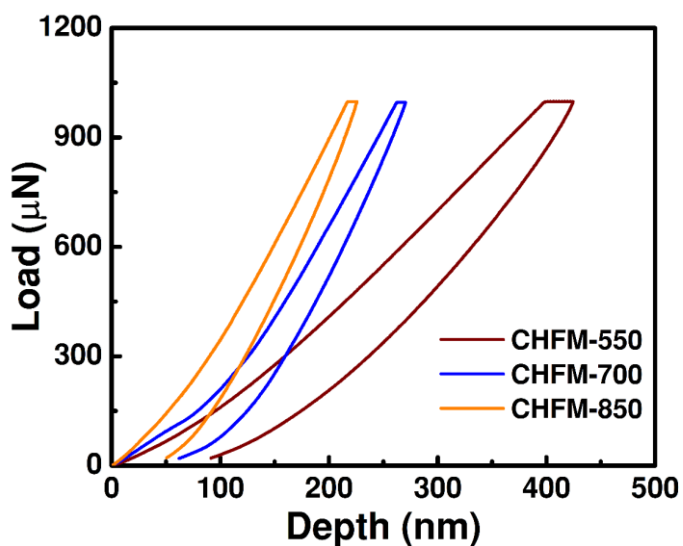

**Supplementary Fig. 7.** Load-displacement curves of CHFMs from nanoindentation tests.

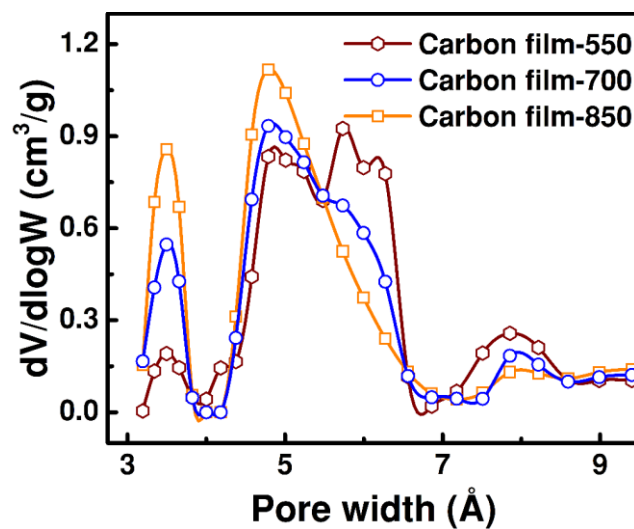

**Supplementary Fig. 8.** Pore size distribution of carbon films, calculated by the NLDFT model from CO<sub>2</sub> physisorption at 0 °C.

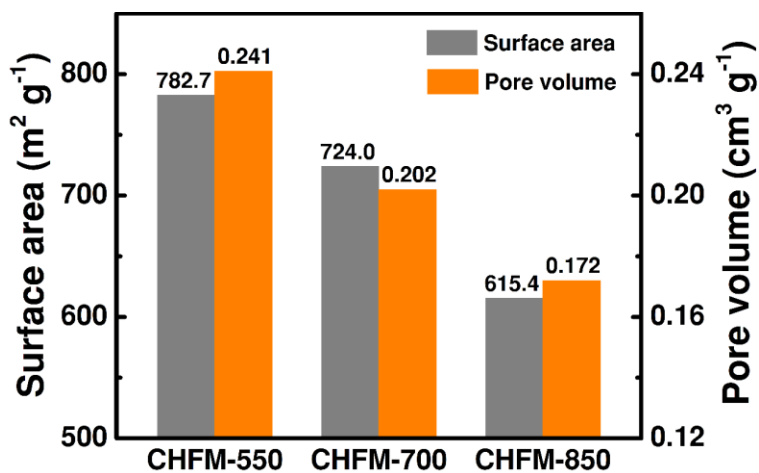

**Supplementary Fig. 9.** The surface area and pore volume of CHFMs calculated by the NLDFT model from CO<sub>2</sub> physisorption at 0 °C.

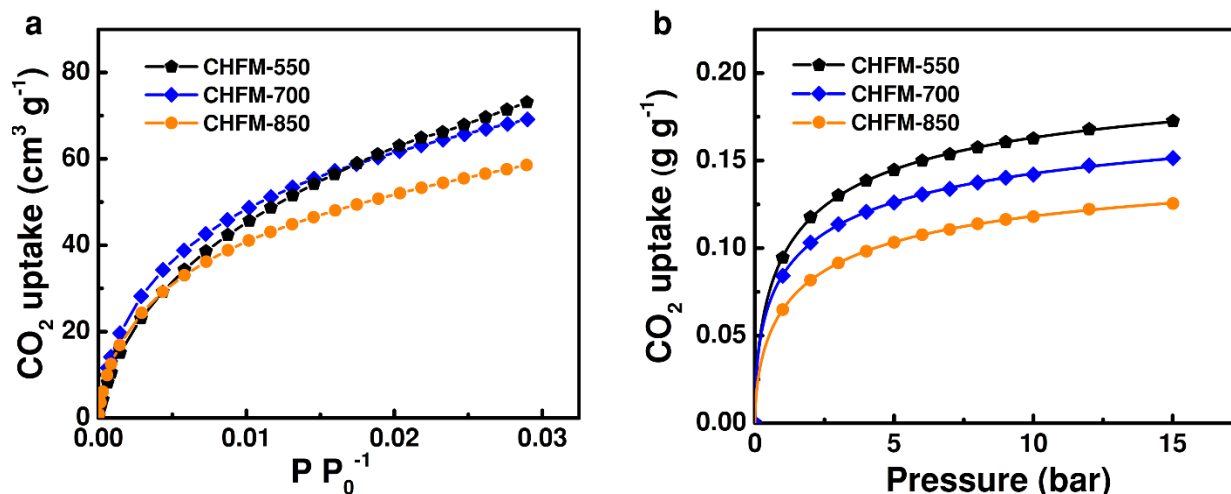

**Supplementary Fig. 10.** CO<sub>2</sub> uptake amount of CHFMs. a) low pressure CO<sub>2</sub> sorption obtained at 0 °C from pressure range of 0-1 bar. b) high pressure CO<sub>2</sub> sorption at 25 °C ranging from 1-15 bar (carried out by a Rubotherm equipped with a magnetic balance).

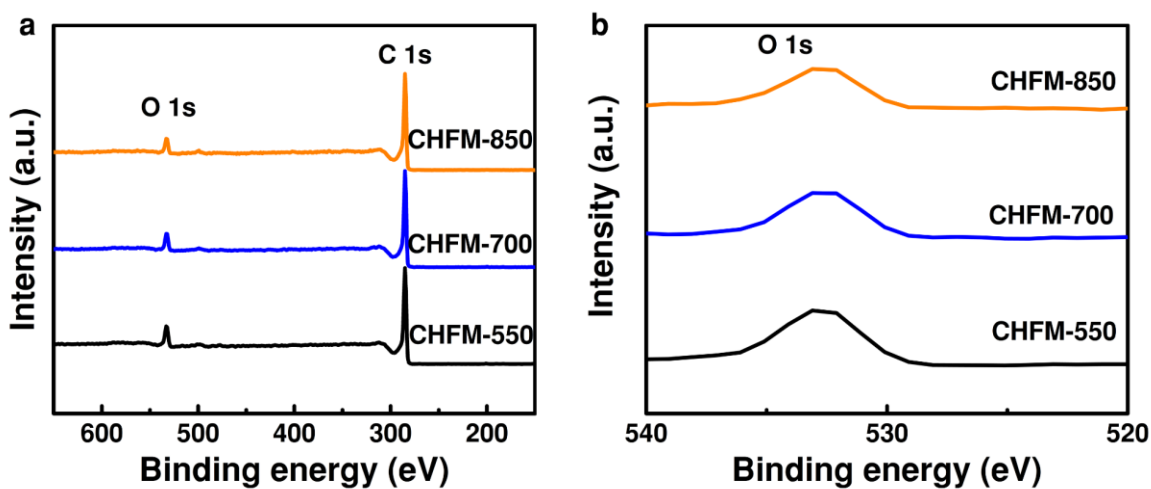

**Supplementary Fig. 11.** a) XPS survey spectra, and b) O 1s spectra for three different CHFMs



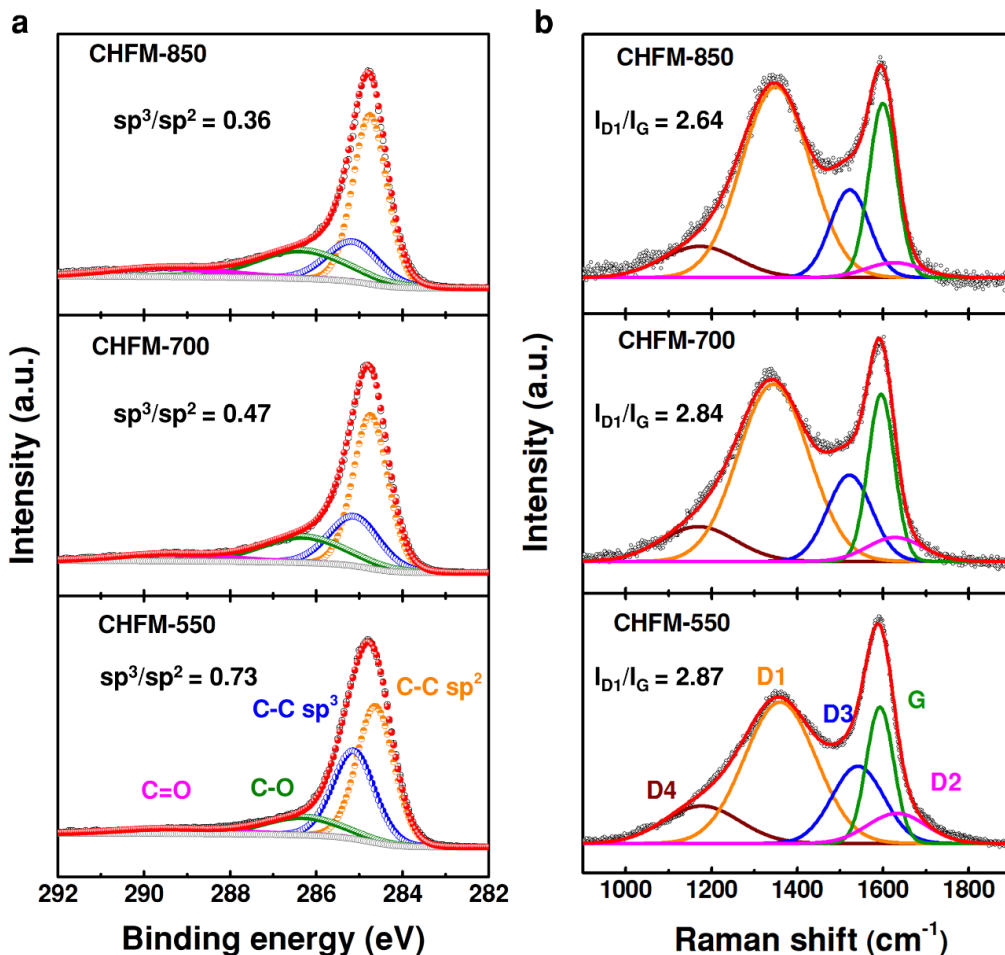

**Supplementary Fig. 12.** a) C1s XPS spectra of the CHFM samples, the transformation of  $sp^3$  to  $sp^2$ -hybridized carbon as the ratios of  $sp^3$  and  $sp^2$  hybridized carbon decrease from 0.73-0.36 following the carbonization temperature from 550 to 850 °C; b) Raman spectra of CHFM samples. The prominent peaks of G and D1 correspond to the  $E_{2g}$ -symmetry vibration mode of  $sp^2$  hybridized carbon and the  $A_{1g}$ -symmetry vibration mode from disordered graphite, respectively. The D2 band at  $\sim 1620\text{ cm}^{-1}$  is assigned to graphitic lattice vibrations mode with  $E_{2g}$ -symmetry (disordered graphitic lattice). The D3 band, located at  $\sim 1525\text{ cm}^{-1}$  is usually ascribed to amorphous carbon, while the D4 band at  $\sim 1165\text{ cm}^{-1}$  is attributed to disordered graphitic lattice or  $sp^3$  impurities.

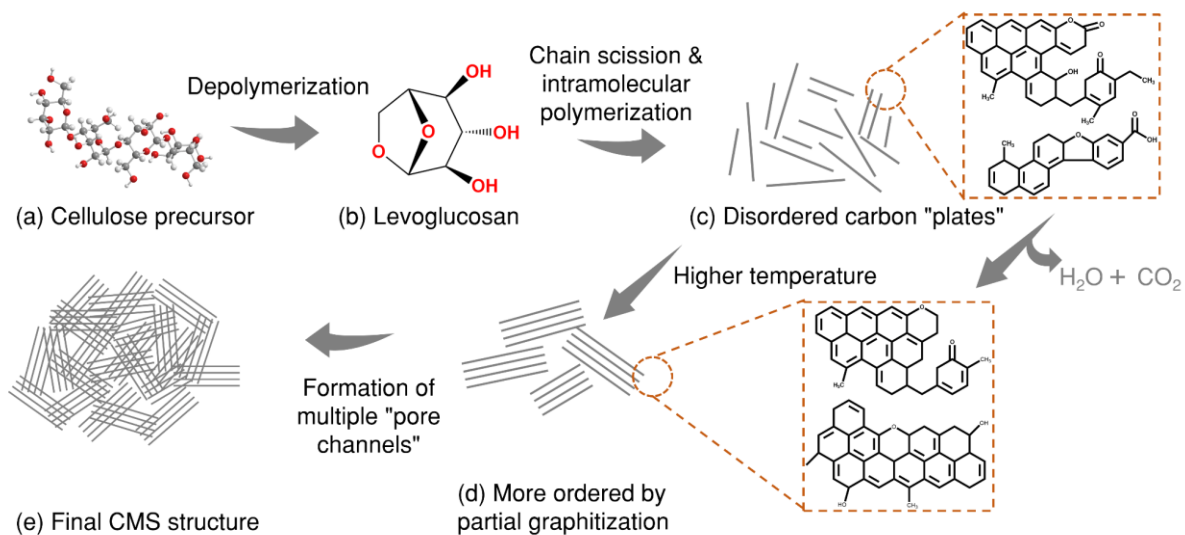

**Supplementary Fig. 13.** A Proposed mechanism of transformation from cellulose precursors to CMS membranes.

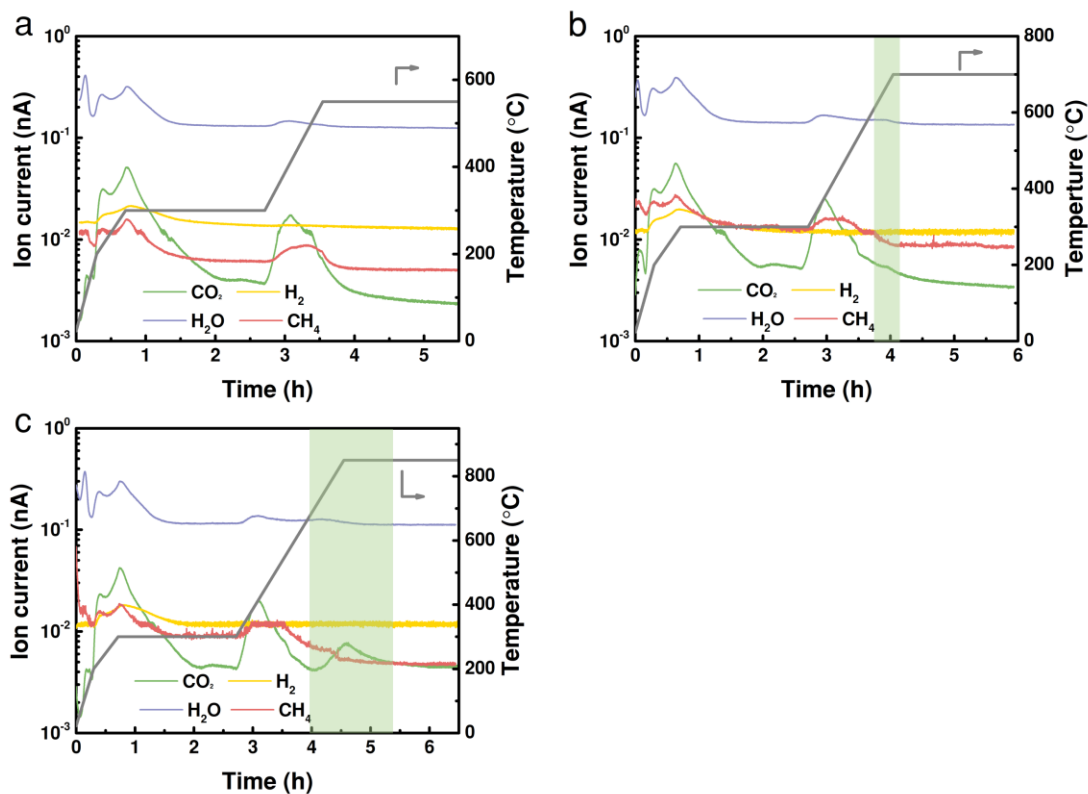

**Supplementary Fig. 14.** The evolved small gas molecules  $\text{CO}_2$ ,  $\text{H}_2$ ,  $\text{H}_2\text{O}$ , and  $\text{CH}_4$  from cellulose carbonization under different carbonization procedures as measured by TGA-MS.

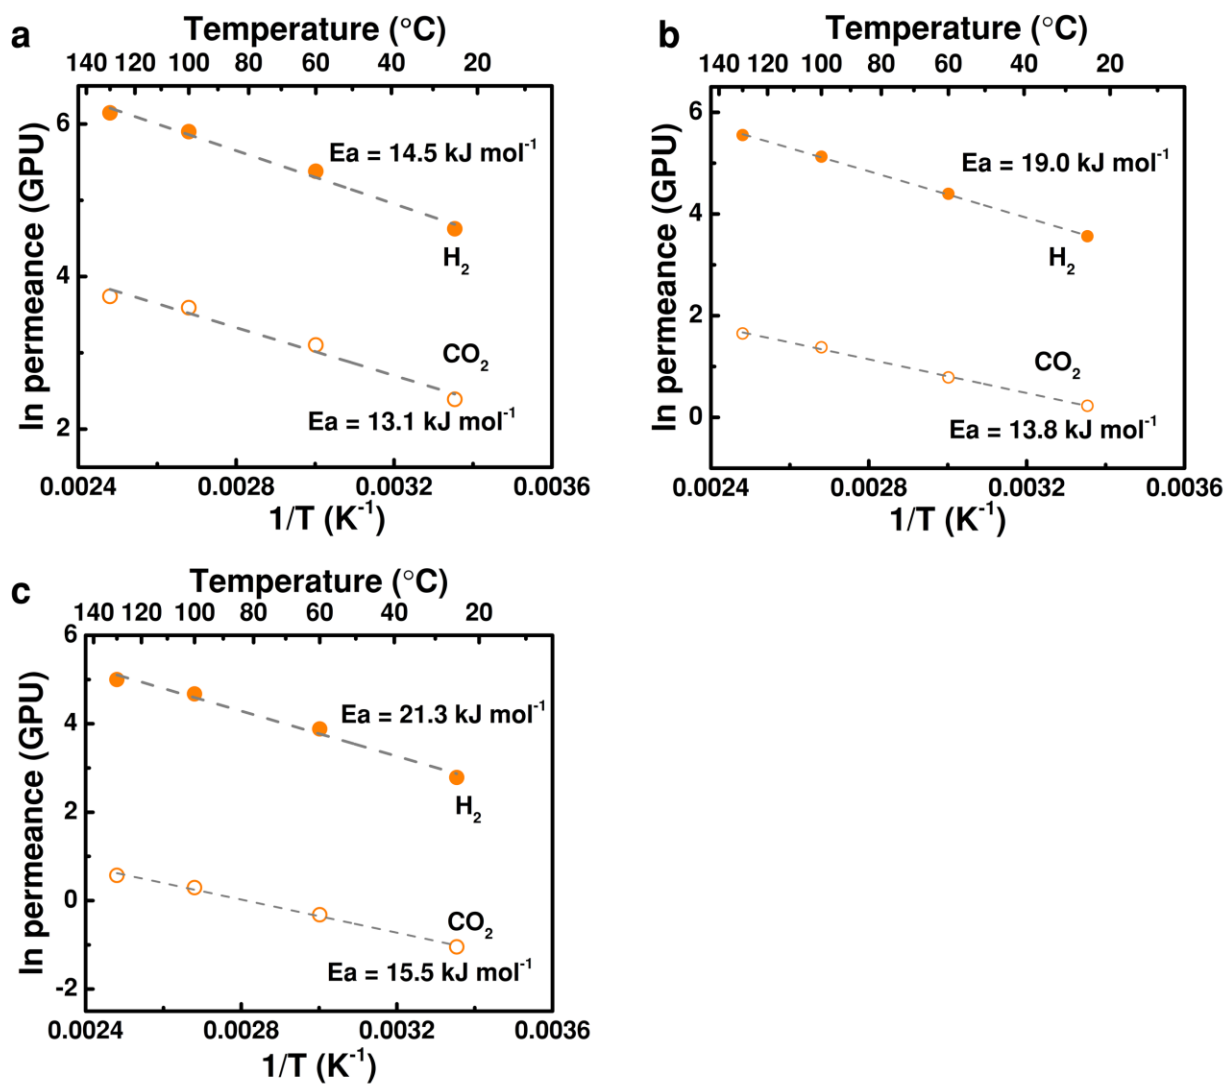

**Supplementary Fig. 15.** Arrhenius plots for H<sub>2</sub> and CO<sub>2</sub> permeances, a) CHFM-550. b) CHFM-700 and c) CHFM-850.

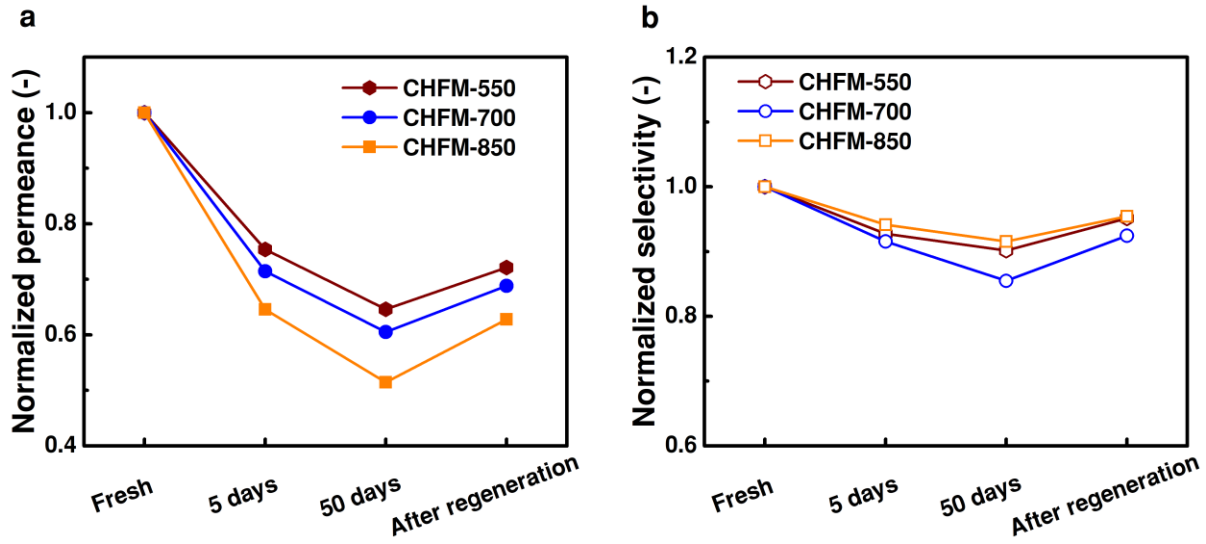

**Supplementary Fig. 16.** Normalized H<sub>2</sub> permeance (a) and H<sub>2</sub>/CO<sub>2</sub> selectivity (b) as a function of aging time, tested at 130 °C for single gas.

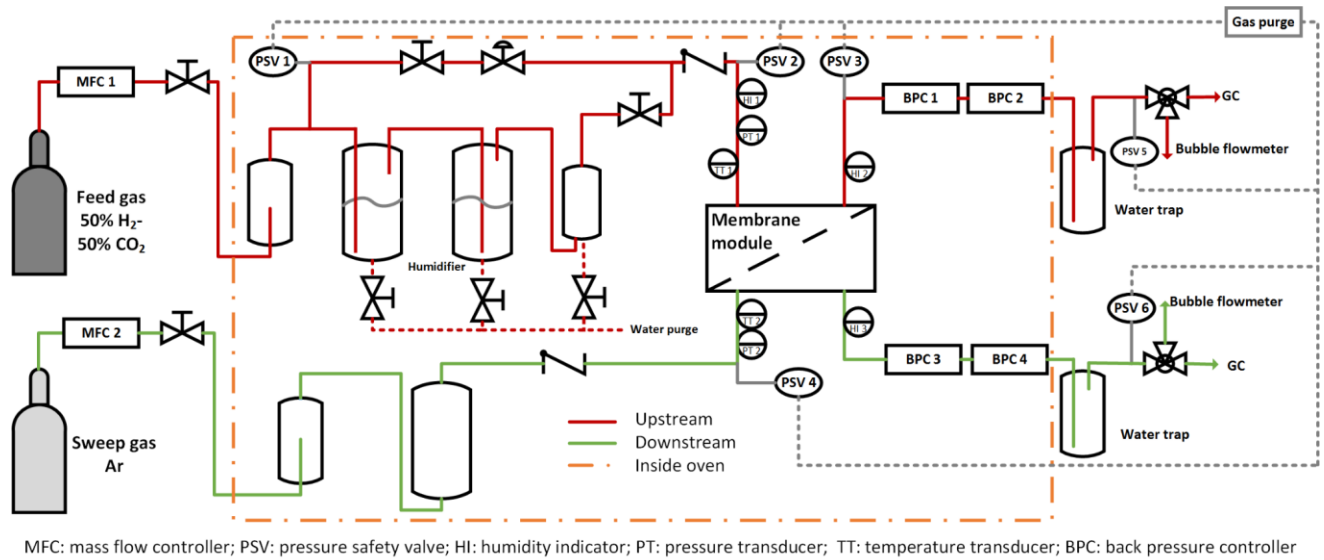

**Supplementary Fig. 17.** Illustration of the high-pressure mixed gas permeation rig with humidity control

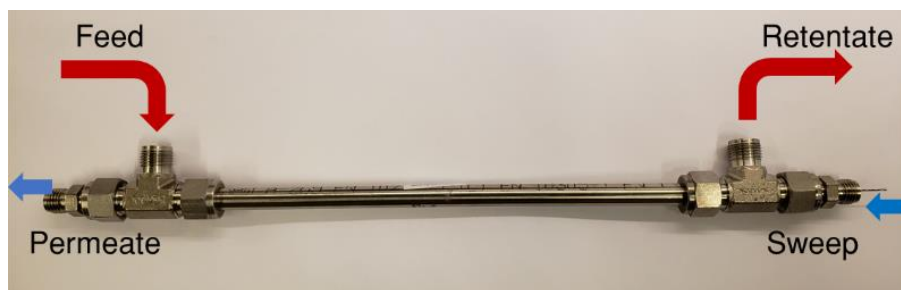

**Supplementary Fig. 18.** A representative module used for mixed gas permeation measurements operated in a counter-current flow pattern. Gas is fed from the shell side, and the permeate gas comes from the bore side using argon as sweep gas.

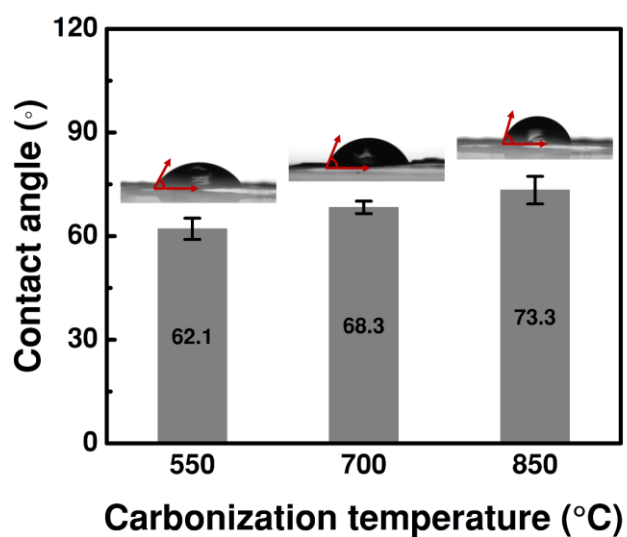

**Supplementary Fig. 19.** Contact angles of water on the CMS membranes prepared at different carbonization temperatures

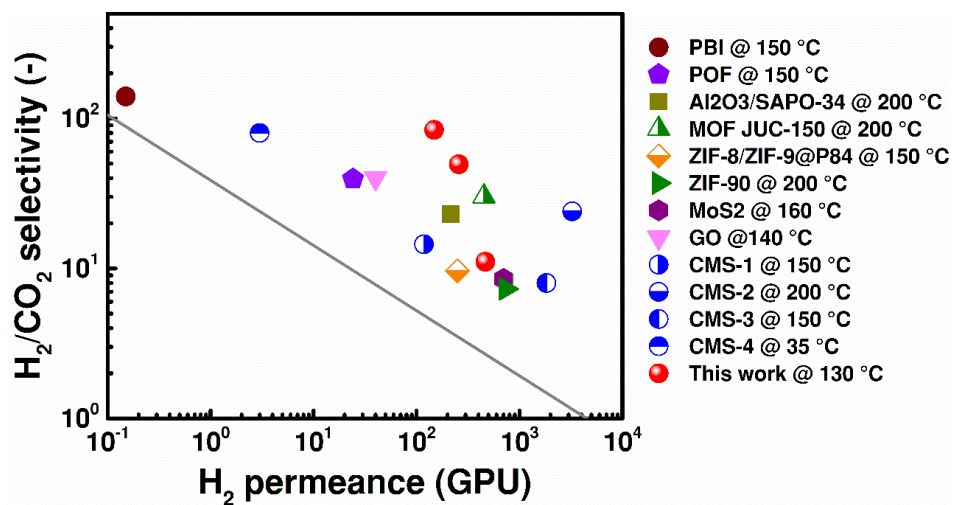

**Supplementary Fig. 20.** Comparison of separation performance of CHFMs with state-of-the-art inorganic membrane materials on an upper bound plot presenting gas permeance (GPU). The solid line is based on the 2008 Robeson upper bound line<sup>9</sup> by converting permeability to permeance (assuming a membrane thickness of 1  $\mu\text{m}$ ).

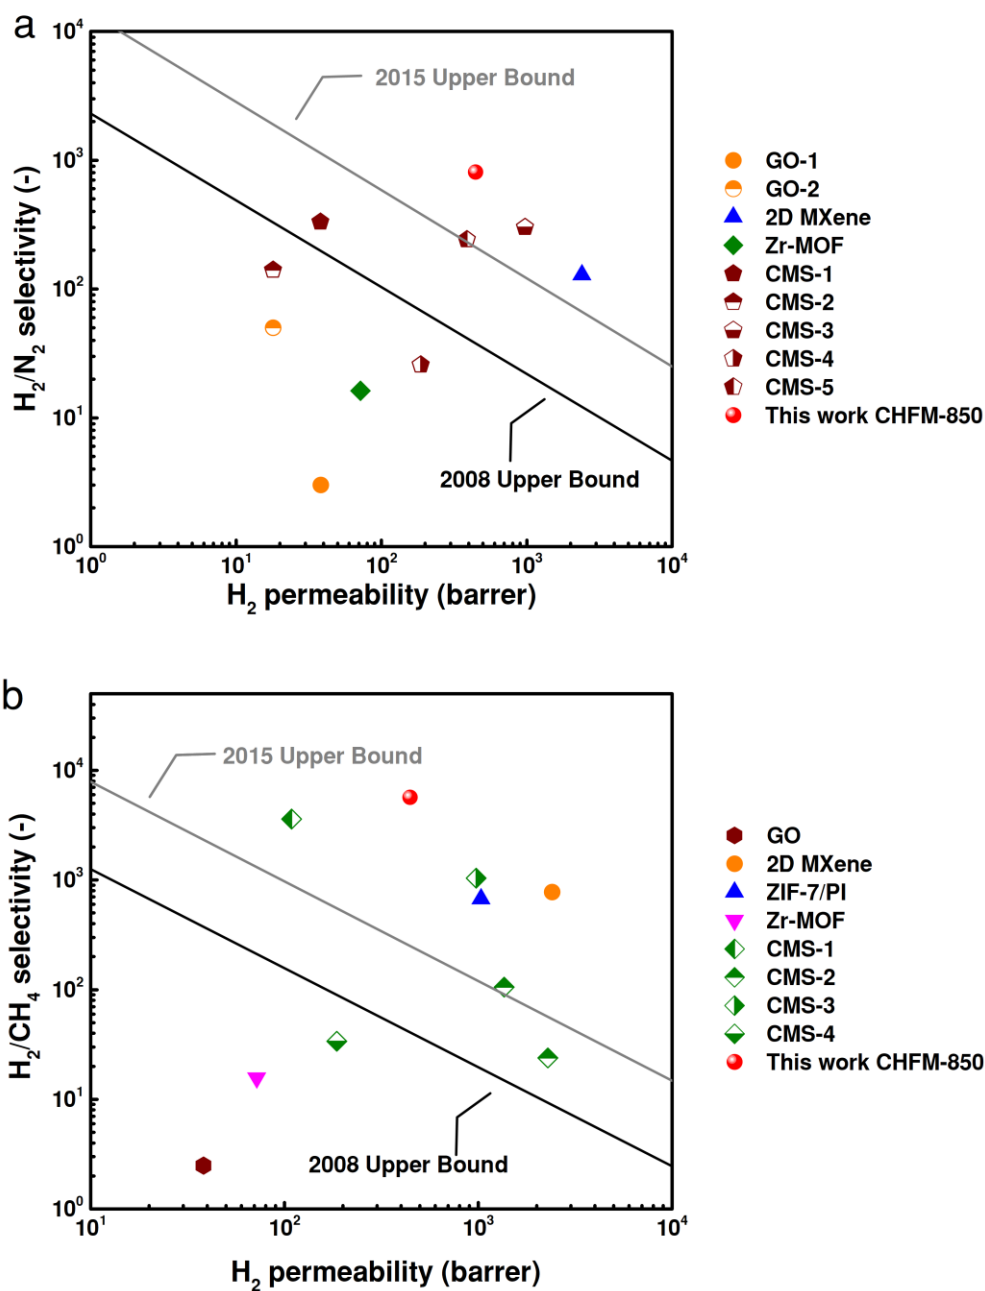

**Supplementary Fig. 21.** Comparison of separation performance of CHFM-850 with state-of-the-art inorganic membrane materials. a)  $H_2/N_2$  separation. b)  $H_2/CH_4$  separation. Details of the comparative membranes are listed in **Supplementary Tables 5** and **6**. The black and gray lines are based on the 2008 Robeson upper bound<sup>9</sup> and 2015 upper bound<sup>10</sup>, respectively.

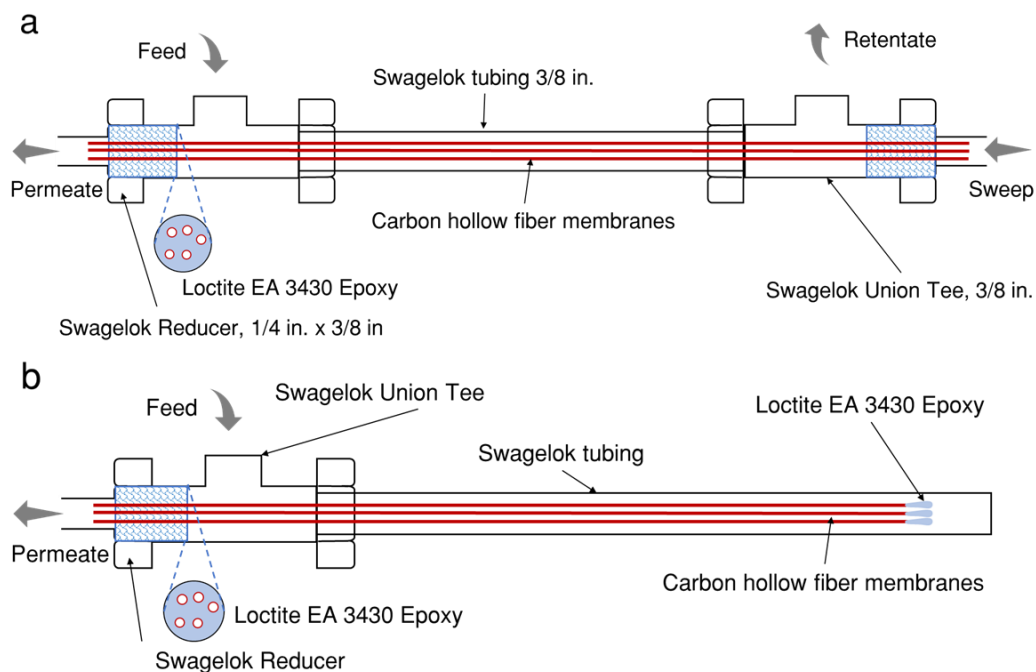

**Supplementary Fig. 22.** Schematic of membrane module for carbon hollow fiber membranes, a) for mixed gas testing, and b) for single gas testing.

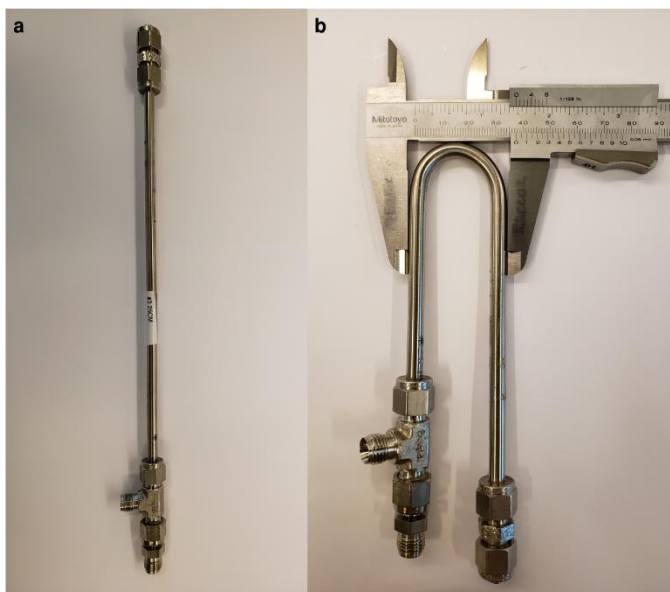

**Supplementary Fig. 23.** Photographs of a membrane module being bent with a diameter of 3.7 cm and used for single gas permeation tests.



**Supplementary Table 1.** Cellulose hollow fiber spinning conditions.

| Spinning conditions                       | Value                                               |
|-------------------------------------------|-----------------------------------------------------|
| Dope solution composition and temperature | 12% MCC in (75 wt.% EmimAc + 25 wt.% DMSO), 25 °C   |
| Bore fluid composition and temperature    | 20% Water in (75 wt.% EmimAc + 25 wt.% DMSO), 25 °C |
| First coagulation bath temperature        | 60 °C                                               |
| Second coagulation bath temperature       | 40 °C                                               |
| Dope flow rate                            | 4.4 mL min <sup>-1</sup>                            |
| Bore flow rate                            | 1.8 mL min <sup>-1</sup>                            |
| Take up speed                             | 14.6 m min <sup>-1</sup>                            |
| Air gap                                   | 8 cm                                                |
| Spinneret OD/ID                           | 0.7/0.5 mm                                          |

**Supplementary Table 2.** Hardness, reduced modulus, and Young's modulus of CHFMs

| Samples  | Hardness (GPa) | Reduced modulus (GPa) | Young's modulus (GPa) |
|----------|----------------|-----------------------|-----------------------|
| CHFM-550 | 0.31±0.06      | 2.16±0.26             | 2.07±0.25             |
| CHFM-700 | 0.84±0.25      | 5.93±0.06             | 5.69±0.07             |
| CHFM-850 | 1.30±0.10      | 7.85±0.50             | 7.53±0.48             |

**Supplementary Table 3.** Elemental composition of the CHFMs from XPS analysis.

|          | C (Atomic %) | O (Atomic %) | N (Atomic %) |
|----------|--------------|--------------|--------------|
| CHFM-550 | 90.08        | 9.26         | 0.67         |
| CHFM-700 | 91.25        | 8.10         | 0.65         |
| CHFM-850 | 92.41        | 7.04         | 0.55         |

**Supplementary Table 4.** Membrane performances of polymeric and inorganic membranes presented in Fig. 4. The reported permeances (GPU) in literature were converted to permeability (barrer) based on selective layer thickness of membranes (1  $\mu\text{m}$  was assumed if the thickness is not given).

| Membrane materials                      | Performance                          |                                   | Test conditions  |            |                     | Reference |
|-----------------------------------------|--------------------------------------|-----------------------------------|------------------|------------|---------------------|-----------|
|                                         | H <sub>2</sub> Permeability (barrer) | $\alpha_{\text{H}_2/\text{CO}_2}$ | Type of analysis | Temp. (°C) | Feed pressure (bar) |           |
| PBI                                     | 1.5                                  | 140                               | Single gas       | 150        | 14                  | 11        |
| POF                                     | 24.2                                 | 39.5                              | Mixed gas        | 150        | 2                   | 12        |
| MOF JUC-150                             | 452.4 (based on 1 $\mu\text{m}$ )    | 30.2                              | Mixed gas        | 200        | 1                   | 13        |
| Al <sub>2</sub> O <sub>3</sub> /SAPO-34 | 214.7 (based on 1 $\mu\text{m}$ )    | 23.0                              | Mixed gas        | 200        | 3.5                 | 14        |
| ZIF-8/ZIF-9@P84                         | 500                                  | 9.6                               | Mixed gas        | 150        | -                   | 15        |
| ZIF-90                                  | 14784                                | 7.3                               | Single gas       | 200        | 1                   | 16        |
| GO                                      | ~40                                  | ~40                               | Single gas       | 140        | 1                   | 17        |
| MoS <sub>2</sub>                        | 240                                  | 8.5                               | Mixed gas        | 160        | 1                   | 18        |
| CMS-1                                   | 1065                                 | 14.5                              | Single gas       | 150        | -                   | 19        |
| CMS-2                                   | 650                                  | 24                                | Single gas       | 200        | 2                   | 7         |
| CMS-3                                   | 228.4                                | 8                                 | Single gas       | 150        | 1                   | 20        |
| CMS-4                                   | 54                                   | 80                                | Single gas       | 150        | 11                  | 21        |
| CHFM-550                                | 1400.3                               | 11.1                              | Single gas       | 130        | 2                   | This work |
| CHFM-700                                | 773.3                                | 49.5                              | Single gas       | 130        | 2                   | This work |
| CHFM-850                                | 444.6                                | 83.9                              | Single gas       | 130        | 2                   | This work |

**Supplementary Table 5.** Membrane performances of inorganic-based membranes presented in Supplementary Fig. 21a. The separation performances, which were reported as permeance (GPU) in literature, were converted to permeability (barrer).

| Membrane materials | Performance                          |                                  | Test conditions  |            |                     | Reference |
|--------------------|--------------------------------------|----------------------------------|------------------|------------|---------------------|-----------|
|                    | H <sub>2</sub> Permeability (barrer) | $\alpha_{\text{H}_2/\text{N}_2}$ | Type of analysis | Temp. (°C) | Feed pressure (bar) |           |
| CMS-1              | 38.1                                 | 331                              | Single gas       | 22         | -                   | 22        |
| CMS-2              | 18.0                                 | 141                              | Mixed gas        | 220        | 2                   | 23        |
| CMS-3              | 974                                  | 302                              | Single gas       | 21         | 6                   | 24        |
| CMS-4              | 186.3                                | 25.8                             | Single gas       | 21         | -                   | 25        |
| CMS-5              | 388.3                                | 243                              | Single gas       | 25         | 1                   | 26        |
| GO-1               | 38.2                                 | ~3                               | Single gas       | 25         | 1                   | 17        |
| GO-2               | ~18                                  | ~50                              | Mixed gas        | 100        | 1                   | 27        |
| 2D MXene           | 2402                                 | 129                              | Single gas       | 25         | 1                   | 28        |
| Zr-MOF             | 71.9                                 | 16.2                             | Single gas       | 25         | 1                   | 29        |
| This work CHFM-850 | 444.6                                | 829.0                            | Single gas       | 130        | 2                   |           |

**Supplementary Table 6.** Membrane performances of inorganic-based membranes presented in Supplementary Fig. 21b.

| Membrane materials | Performance                          |                                   | Test conditions  |            |                     | Reference |
|--------------------|--------------------------------------|-----------------------------------|------------------|------------|---------------------|-----------|
|                    | H <sub>2</sub> Permeability (barrer) | $\alpha_{\text{H}_2/\text{CH}_4}$ | Type of analysis | Temp. (°C) | Feed pressure (bar) |           |
| CMS-1              | 108.6                                | 3620                              | Single gas       | 29.5       | 2                   | 30        |
| CMS-2              | 1359                                 | 106                               | Single gas       | 130        | 1.5                 | 31        |
|                    | 2283                                 | 24.1                              | Single gas       | 130        | 1.5                 |           |
| CMS-3              | 974                                  | 1047                              | Single gas       | 21         | 6                   | 24        |
| CMS-4              | 186.3                                | 34.2                              | Single gas       | 21         | -                   | 25        |
| ZIF-7@polyimide    | 674                                  | 128.4                             | Single gas       | 100        | 2                   | 32        |
| GO                 | 38.2                                 | 2.5                               | Single gas       | 25         | 1                   | 17        |
| 2D MXene           | 2402                                 | 780                               | Single gas       | 25         | 1                   | 27        |
| Zr-MOF             | 71.9                                 | 15.7                              | Single gas       | 25         | 1                   | 29        |
| This work CHFM-850 | 444.6                                | 5706                              | Single gas       | 130        | 2                   |           |

## References

1. Oliver WC, Pharr GM. An improved technique for determining hardness and elastic modulus using load and displacement sensing indentation experiments. *Journal of Materials Research* **7**, 1564-1583 (1992).
2. McCartney LN. Predicting Properties of Undamaged and Damaged Carbon Fibre Reinforced Composites. In: *The Structural Integrity of Carbon Fiber Composites: Fifty Years of Progress and Achievement of the Science, Development, and Applications* (Springer International Publishing, 2017).
3. Niu J, *et al.* Biomass-derived mesopore-dominant porous carbons with large specific surface area and high defect density as high performance electrode materials for Li-ion batteries and supercapacitors. *Nano Energy* **36**, 322-330 (2017).
4. Lee SW, *et al.* High-power lithium batteries from functionalized carbon-nanotube electrodes. *Nature Nanotechnology* **5**, 531-537 (2010).

5. Sadezky A, Muckenhuber H, Grothe H, Niessner R, Pöschl U. Raman microspectroscopy of soot and related carbonaceous materials: Spectral analysis and structural information. *Carbon* **43**, 1731-1742 (2005).
6. Gao J, *et al.* Construction of a sp<sup>3</sup>/sp<sup>2</sup> Carbon Interface in 3D N-Doped Nanocarbons for the Oxygen Reduction Reaction. *Angewandte Chemie International Edition* **58**, 15089-15097 (2019).
7. Ngamou PHT, Ivanova ME, Guillon O, Meulenber WA. High-performance carbon molecular sieve membranes for hydrogen purification and pervaporation dehydration of organic solvents. *Journal of Materials Chemistry A* **7**, 7082-7091 (2019).
8. Rungta M, *et al.* Carbon molecular sieve structure development and membrane performance relationships. *Carbon* **115**, 237-248 (2017).
9. Robeson LM. The upper bound revisited. *Journal of Membrane Science* **320**, 390-400 (2008).
10. Swaidan R, Ghanem B, Pinnau I. Fine-Tuned Intrinsically Ultramicroporous Polymers Redefine the Permeability/Selectivity Upper Bounds of Membrane-Based Air and Hydrogen Separations. *ACS Macro Letters* **4**, 947-951 (2015).
11. Zhu L, Swihart MT, Lin H. Unprecedented size-sieving ability in polybenzimidazole doped with polyprotic acids for membrane H<sub>2</sub>/CO<sub>2</sub> separation. *Energy & Environmental Science* **11**, 94-100 (2018).
12. Shan M, *et al.* Facile manufacture of porous organic framework membranes for precombustion CO<sub>2</sub> capture. *Science Advances* **4**, eaau1698 (2018).
13. Kang Z, *et al.* Highly selective sieving of small gas molecules by using an ultra-microporous metal-organic framework membrane. *Energy & Environmental Science* **7**, 4053-4060 (2014).
14. Yu M, Funke HH, Noble RD, Falconer JL. H<sub>2</sub> Separation Using Defect-Free, Inorganic Composite Membranes. *Journal of the American Chemical Society* **133**, 1748-1750 (2011).
15. Cacho-Bailo F, *et al.* On the molecular mechanisms for the H<sub>2</sub>/CO<sub>2</sub> separation performance of zeolite imidazolate framework two-layered membranes. *Chemical Science* **8**, 325-333 (2017).
16. Huang A, Dou W, Caro J. Steam-Stable Zeolitic Imidazolate Framework ZIF-90 Membrane with Hydrogen Selectivity through Covalent Functionalization. *Journal of the American Chemical Society* **132**, 15562-15564 (2010).
17. Kim HW, *et al.* Selective Gas Transport Through Few-Layered Graphene and Graphene Oxide Membranes. *Science* **342**, 91 (2013).
18. Achari A, S S, Eswaramoorthy M. High performance MoS<sub>2</sub> membranes: effects of thermally driven phase transition on CO<sub>2</sub> separation efficiency. *Energy & Environmental Science* **9**, 1224-1228 (2016).
19. Sá S, Sousa JM, Mendes A. Steam reforming of methanol over a CuO/ZnO/Al<sub>2</sub>O<sub>3</sub> catalyst part II: A carbon membrane reactor. *Chemical Engineering Science* **66**, 5523-5530 (2011).

20. Richter H, *et al.* High-Flux Carbon Molecular Sieve Membranes for Gas Separation. *Angewandte Chemie International Edition* **56**, 7760-7763 (2017).
21. Omidvar M, *et al.* Unexpectedly Strong Size-Sieving Ability in Carbonized Polybenzimidazole for Membrane H<sub>2</sub>/CO<sub>2</sub> Separation. *ACS Applied Materials & Interfaces* **11**, 47365-47372 (2019).
22. Shiflett MB, Foley HC. Ultrasonic Deposition of High-Selectivity Nanoporous Carbon Membranes. *Science* **285**, 1902 (1999).
23. Hou J, *et al.* Carbon Nanotube Networks as Nanoscaffolds for Fabricating Ultrathin Carbon Molecular Sieve Membranes. *ACS Applied Materials & Interfaces* **10**, 20182-20188 (2018).
24. Ogieglo W, Puspasari T, Ma X, Pinnau I. Sub-100 nm carbon molecular sieve membranes from a polymer of intrinsic microporosity precursor: Physical aging and near-equilibrium gas separation properties. *Journal of Membrane Science* **597**, 117752 (2020).
25. Ogieglo W, Furchner A, Ma X, Hazazi K, Alhazmi AT, Pinnau I. Thin Composite Carbon Molecular Sieve Membranes from a Polymer of Intrinsic Microporosity Precursor. *ACS Applied Materials & Interfaces* **11**, 18770-18781 (2019).
26. Tseng H-H, Wang C-T, Zhuang G-L, Uchytel P, Reznickova J, Setnickova K. Enhanced H<sub>2</sub>/CH<sub>4</sub> and H<sub>2</sub>/CO<sub>2</sub> separation by carbon molecular sieve membrane coated on titania modified alumina support: Effects of TiO<sub>2</sub> intermediate layer preparation variables on interfacial adhesion. *Journal of Membrane Science* **510**, 391-404 (2016).
27. Li H, *et al.* Ultrathin, Molecular-Sieving Graphene Oxide Membranes for Selective Hydrogen Separation. *Science* **342**, 95 (2013).
28. Ding L, *et al.* MXene molecular sieving membranes for highly efficient gas separation. *Nature Communications* **9**, 155 (2018).
29. Ghalei B, *et al.* Rational Tuning of Zirconium Metal-Organic Framework Membranes for hydrogen purification. *Angewandte Chemie International Edition* **58**, 19034-19040 (2019).
30. Campo MC, Magalhães FD, Mendes A. Carbon molecular sieve membranes from cellophane paper. *Journal of Membrane Science* **350**, 180-188 (2010).
31. Huang S, *et al.* Ultrathin Carbon Molecular Sieve Films and Room-Temperature Oxygen Functionalization for Gas-Sieving. *ACS Applied Materials & Interfaces* **11**, 16729-16736 (2019).
32. Ma X, Wu X, Caro J, Huang A. Polymer Composite Membrane with Penetrating ZIF-7 Sheets Displays High Hydrogen Permselectivity. *Angewandte Chemie International Edition* **58**, 16156-16160 (2019).
